# Supplementary material for: Visible responses under high pressure in crystals: phenolphthalein and its analogues with adjustable ring-opening threshold pressures
Source: Royal Society of Chemistry journal article supplement (doi:10.1039/c9cc01145e), 2019-01-01
Supplement: c9cc01145e1.pdf [file c9cc01145e1.pdf]

## Supporting Information

### **Visible responses under high pressure in crystals: phenolphthalein and its analogues with adjustable ring-opening threshold pressures**

Xinyuan Deng,<sup>a</sup> Hongwei Guo,<sup>b</sup> Xiao Meng,<sup>a</sup> Kai Wang,<sup>b</sup> Bo Zou\*<sup>b</sup> and Yuguo Ma\*<sup>a</sup>

*a. Beijing National Laboratory for Molecular Sciences (BNLMS), Center for Soft Matter  
Science and Engineering, Key Lab of Polymer Chemistry & Physics of Ministry of  
Education, College of Chemistry, Peking University, Beijing 100871, China*

*b. State Key Laboratory of Superhard Materials, College of Physics, Jilin University,  
Changchun 130012, China*

### **Table of Contents**

|                                                                                              |           |
|----------------------------------------------------------------------------------------------|-----------|
| <b><i>Experimental Section</i></b> .....                                                     | <b>2</b>  |
| <b><i>UV Radiation Experiments</i></b> .....                                                 | <b>4</b>  |
| <b><i>In situ UV-vis Absorption and Raman Spectra</i></b> .....                              | <b>4</b>  |
| <b><i>Quantify the Relationship between Pressure and the Ring-opening Reaction</i></b> ..... | <b>9</b>  |
| <b><i>Crystal Data and Structure Refinement</i></b> .....                                    | <b>10</b> |
| <b><i>References</i></b> .....                                                               | <b>16</b> |

## Experimental Section

**General Methods:** Chemicals were purchased commercially and used without further purification unless otherwise noted. Tetrahydrofuran (THF) was freshly distilled from sodium under N<sub>2</sub> prior to use. Dichloromethane (DCM) was freshly distilled from calcium hydride under N<sub>2</sub> prior to use. PMMA was purchased from ourchem, and its *M<sub>w</sub>* is 35,000 Da. <sup>1</sup>H NMR and <sup>13</sup>C NMR spectra were recorded on a Bruker-400 (400 MHz) spectrometer using CDCl<sub>3</sub> as solvent. Chemical shifts are reported in parts per million (ppm). <sup>1</sup>H NMR chemical shifts were referenced versus TMS (0 ppm), while <sup>13</sup>C NMR chemical shifts were referenced versus CDCl<sub>3</sub> (77.0 ppm). Mass spectra were recorded on a VG ZAB-HS mass spectrometer. Powder X-ray diffraction (PXRD) data was collected on a PHILIPS X'Pert Pro diffractometer with an X'celerator detector in the reflection mode, using monochromatized Cu Kα radiation.

High pressure experiments were performed using symmetric diamond anvil cells (DACs) at room temperature. The culet diameter of the diamond anvils was 500 μm. The crystal was placed in the holes (diameter: ca. 170 μm) of a T301 steel gasket, which was pre-indented to a thickness of 50 μm. The silicon oil was used as pressure transmitting medium (PTM). A small ruby chip was inserted into the sample compartment for *in situ* pressure calibration according to the R1 ruby fluorescence method. The *in situ* UV-vis absorption measurements under high pressure are performed on an Ocean Optics QE65000 Scientific-grade spectrometer. The photoluminescence measurements under high pressure were performed on a QE65000 Scientific-grade spectrometer in the reflection mode. High-pressure unpolarized Raman spectra were recorded using Acton SP2500i spectrometer (Princeton Instruments) equipped with the liquid nitrogen cooled CCD (PyLon: 100B). The 532 nm radiation from the diode pumped solid state (DPSS) laser was utilized to excite the sample and the output power was 10 mW. The 785 nm single mode laser was utilized to excite the sample and the output power was 50 mW.

### Synthesis and Characterization:

PP was purchased from TCI company with >98% purity, and recrystallized in ethanol before use. PP-NMe<sub>2</sub> was synthesized by optimizing the reaction conditions in the literature<sup>1</sup>. PP-H was synthesized according to the literature<sup>2</sup>. The single crystal of PP-NMe<sub>2</sub> was obtained from dichloromethane/petroleum ether. The single crystal of PP-H was obtained from ethyl acetate/petroleum ether.

#### 3,3-bis(4-(dimethylamino)phenyl)isobenzofuran-1(3H)-one (PP-NMe<sub>2</sub>)

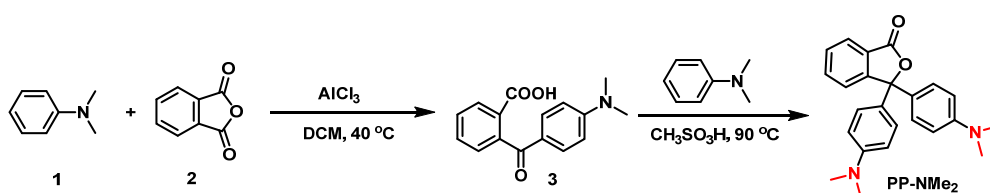

To a stirred solution of phthalic anhydride **2** (3.26 g, 22 mmol) and aluminum chloride

(8.80 g, 66 mmol) in 50 mL anhydrous dichloromethane, *N,N*-dimethylaniline (2.5 mL, 22 mmol) was added slowly at room temperature (rt). Then the reaction was heated to 40 °C for 3 h. The reaction was cooled to rt, and poured into ice water. Sodium hydroxide was added to adjust the pH around 2-3. Some precipitate came out in the solution and was filtered out. The pH of the filtrate was adjusted to 3-4, and the precipitate was filtered out. The filter residue **3** was dried. To a solution of **3** (2.9 g, 11 mmol) in 10 mL methanesulfonic acid, *N,N*-dimethylaniline (2.7 mL, 22 mmol) was added at rt. The mixture was heated at 90 °C for 12 h. The reaction was cooled to rt, and ice water was added. The resulting mixture was extracted with dichloromethane (3 × 20 mL). The combined organic layers were then extracted with brine. Then it was dried over MgSO<sub>4</sub> and filtered. The solvent was removed under reduced pressure. The resulting residue was purified by column chromatography using dichloromethane/petroleum ether as eluent. Compound **PP-NMe<sub>2</sub>** was obtained as white crystalline solid (1.6 g, 20%). <sup>1</sup>H NMR (400 MHz, CDCl<sub>3</sub>): δ 7.90 (d, *J* = 7.4 Hz, 1H), 7.64 (t, *J* = 7.5 Hz, 1H), 7.49 (t, *J* = 7.5 Hz, 2H), 7.18 (d, *J* = 8.8 Hz, 4H), 6.63 (d, *J* = 8.8 Hz, 4H), 2.93 (s, 12H). <sup>13</sup>C NMR (100 MHz, CDCl<sub>3</sub>): δ 170.5, 153.5, 150.3, 133.7, 128.7, 128.6, 128.2, 125.8, 125.7, 123.9, 92.7, 40.4. HRMS (ESI) *m/z*: [M + H]<sup>+</sup> calcd for C<sub>24</sub>H<sub>25</sub>N<sub>2</sub>O<sub>2</sub>, 373.1912; found, 373.1911.

### 3,3-diphenylisobenzofuran-1(3H)-one (**PP-H**)

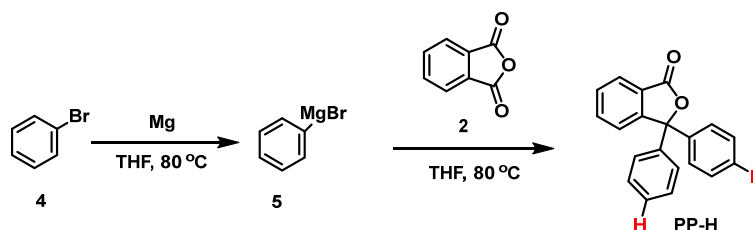

The magnesium ribbon was burnished and cut into small pieces. Mg (0.10 g, 4.2 mmol) and bromobenzene **4** (0.40 mL, 3.8 mmol) were dissolved in 10 mL anhydrous THF, and stirred at 80 °C for 2 h under N<sub>2</sub> atmosphere. Then the mixture was cooled to rt, and added to a THF solution of phthalic anhydride **2** (0.28 g, 1.9 mmol) slowly under N<sub>2</sub> atmosphere at 0 °C. The reaction was heated at 80 °C for 12 h. The reaction was quenched by aqueous solution of HCl (1.0 N) and extracted with ethyl acetate (3 × 20 mL). The combined organic layer was dried over MgSO<sub>4</sub> and filtered. The solvent was evaporated under reduced pressure. The resulting residue was purified by column chromatography using dichloromethane/petroleum ether as an eluent. Compound **PP-H** was obtained as a white crystalline solid (0.21 g, 40%). <sup>1</sup>H NMR (400 MHz, CDCl<sub>3</sub>): δ 7.95 (d, *J* = 7.6 Hz, 1H), 7.74-7.67 (m, 1H), 7.64-7.50 (m, 2H), 7.34 (m, 10H). <sup>13</sup>C NMR (100 MHz, CDCl<sub>3</sub>): δ 170.5, 153.5, 150.3, 133.7, 128.7, 128.6, 128.2, 125.8, 125.7, 123.9, 92.7, 40.4. HRMS (ESI) *m/z*: [M + H]<sup>+</sup> calcd for C<sub>20</sub>H<sub>15</sub>O<sub>2</sub>, 287.1074; found, 287.1067.

## UV Radiation Experiments

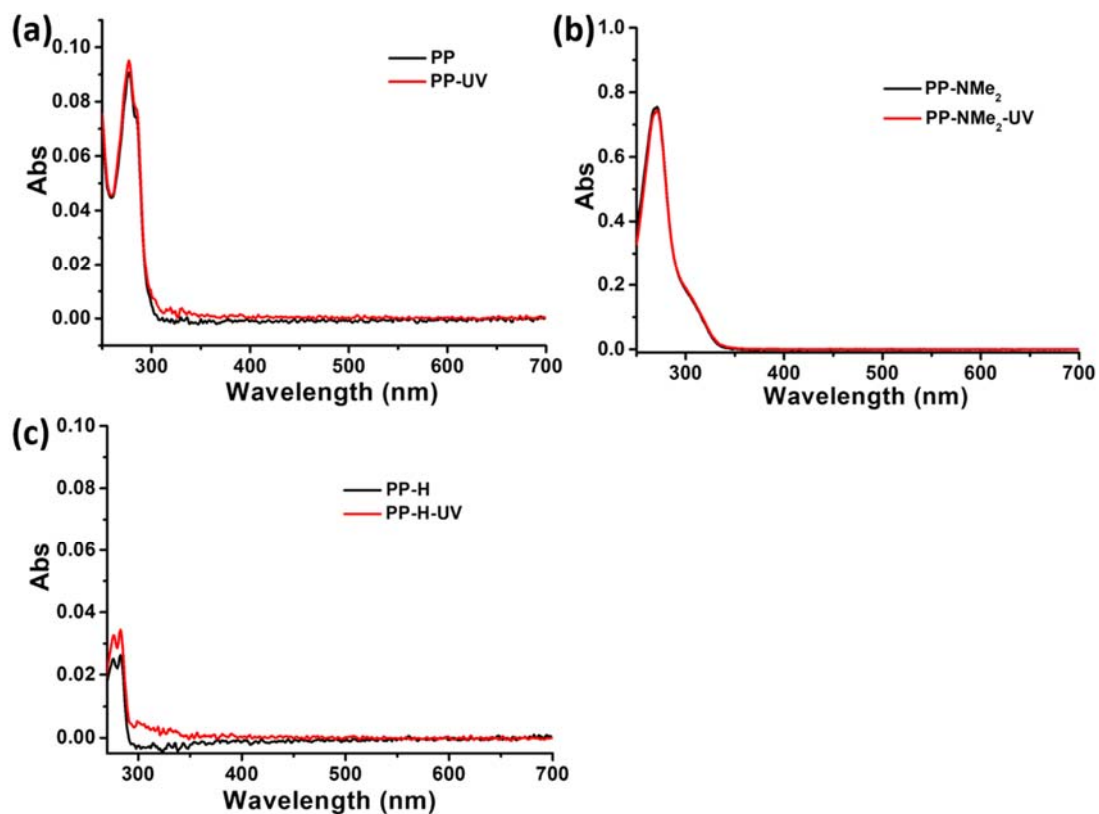

**Figure S1.** UV-vis absorption spectra before and after UV irradiation with Hg lamp at 365 nm (500 W) for 1 h for (a) PP, (b) PP-NMe<sub>2</sub>, and (c) PP-H.

## *In situ* UV-vis Absorption and Raman Spectra

### 1) *In situ* UV-vis Absorption Spectra for PP

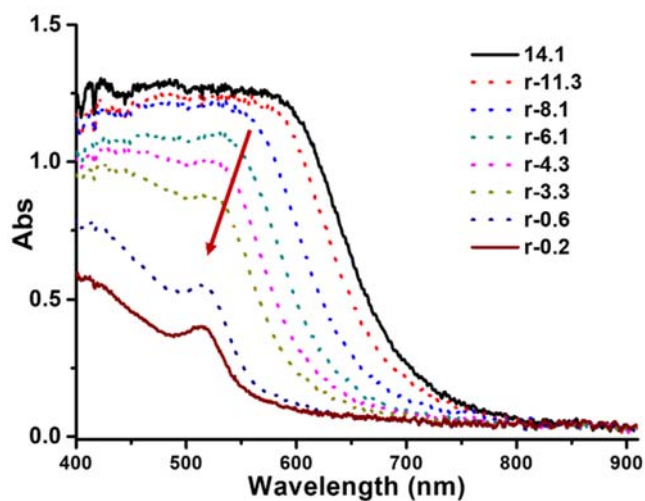

**Figure S2.** *In situ* UV-vis absorption spectra of PP under high pressure during decompression process.

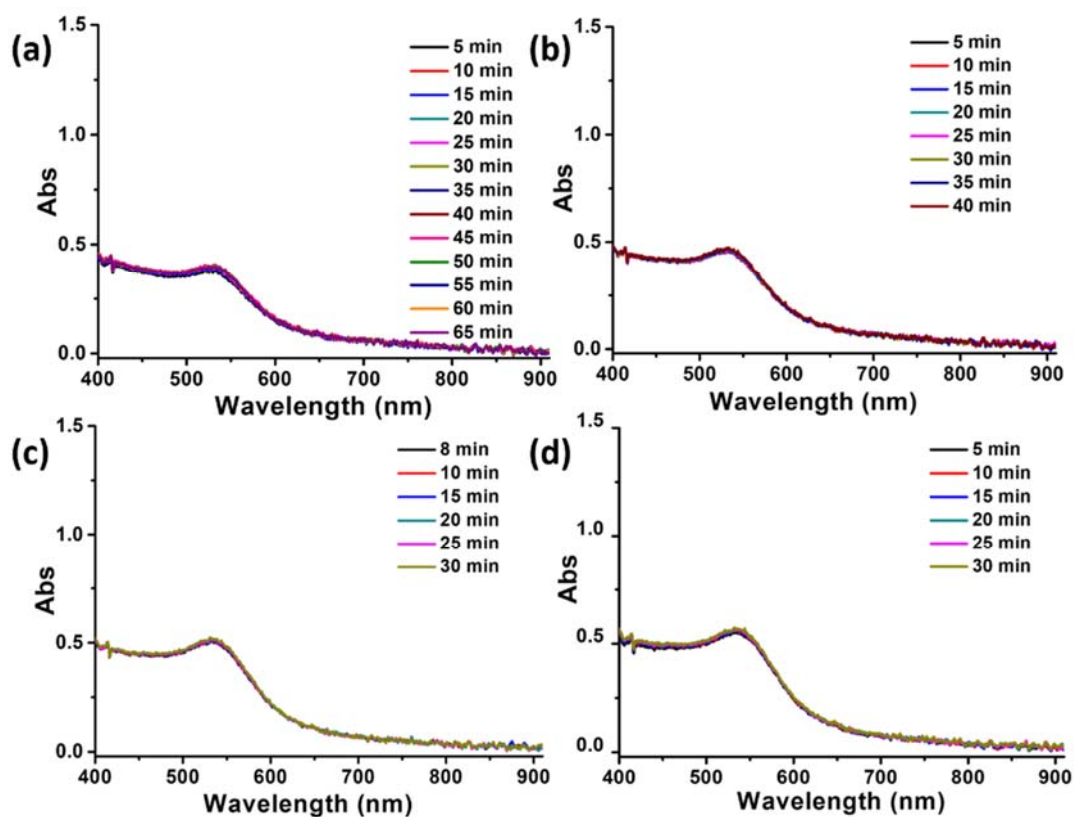

**Figure S3.** *In situ* UV-vis absorption spectra of **PP** over different time under the pressure of (a) 8.5 GPa; (b) 9.2 GPa; (c) 9.6 GPa; (d) 10.0 GPa.

2) *In situ* UV-vis Absorption Spectra for **PP-NMe<sub>2</sub>**

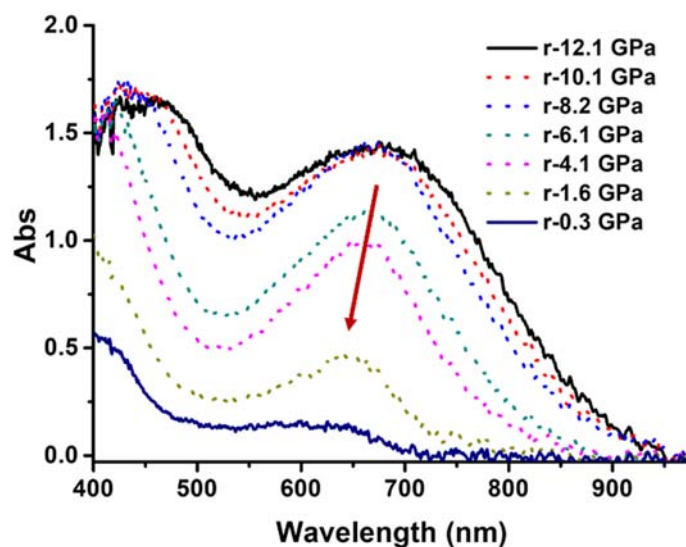

**Figure S4.** *In situ* UV-vis absorption spectra of **PP-NMe<sub>2</sub>** under high pressure during decompression process.

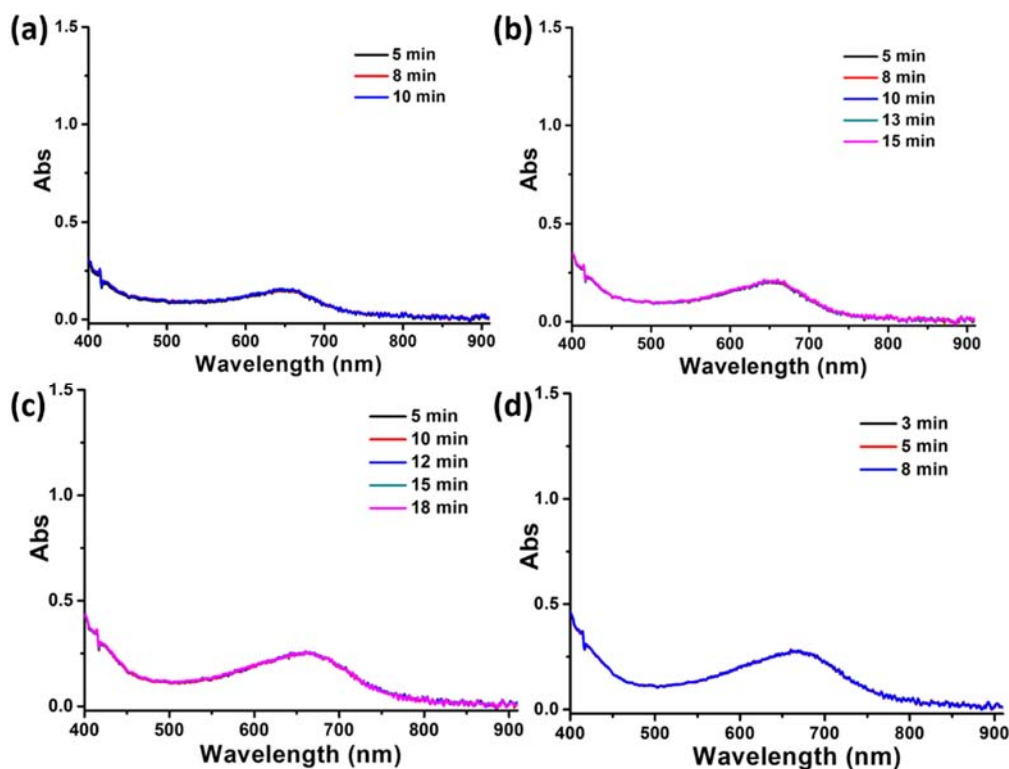

**Figure S5.** UV-vis absorption spectra *in situ* of **PP-NMe<sub>2</sub>** over different time under the pressure of (a) 5.2 GPa; (b) 6.0 GPa; (c) 8.9 GPa; (d) 9.2 GPa.

### 3) *In situ* Raman Spectra of **PP-NMe<sub>2</sub>**

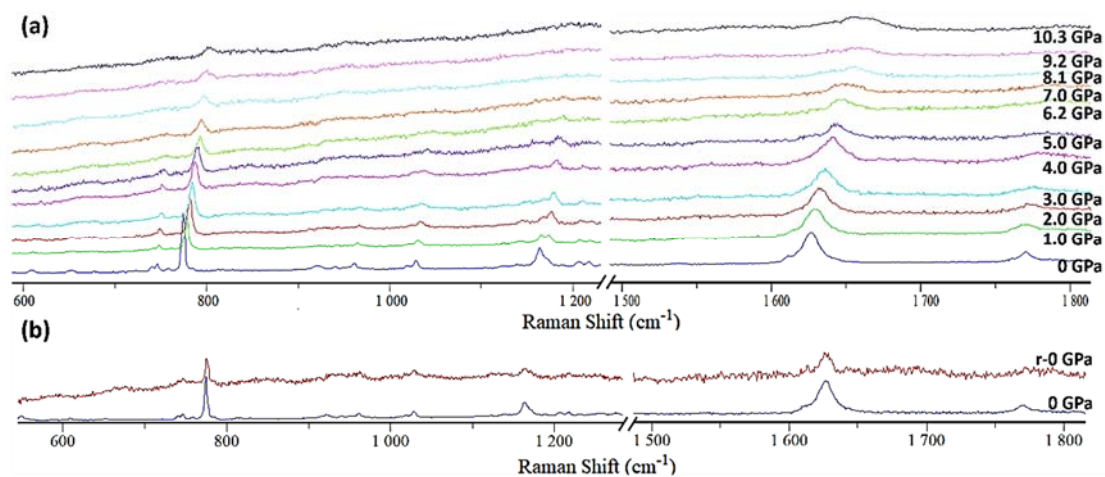

**Figure S6.** (a): *in situ* Raman spectroscopy ( $\lambda_{\text{ex}} = 532 \text{ nm}$ ) of **PP-NMe<sub>2</sub>** under compression process in the range of 0-10.3 GPa; (b): *in situ* Raman spectroscopy of **PP-NMe<sub>2</sub>** before and after pressure treatment.

Relative more intense Raman peaks were chosen to demonstrate the changes in the wave numbers ranging of  $100\text{-}3600 \text{ cm}^{-1}$ . The excitation wavelengths only influence the range of Raman spectra, longer excitation wavelength (785 nm compared with 532 nm) could reduce the interference of fluorescence.



#### 4) *In situ* Raman Spectra of **PP**

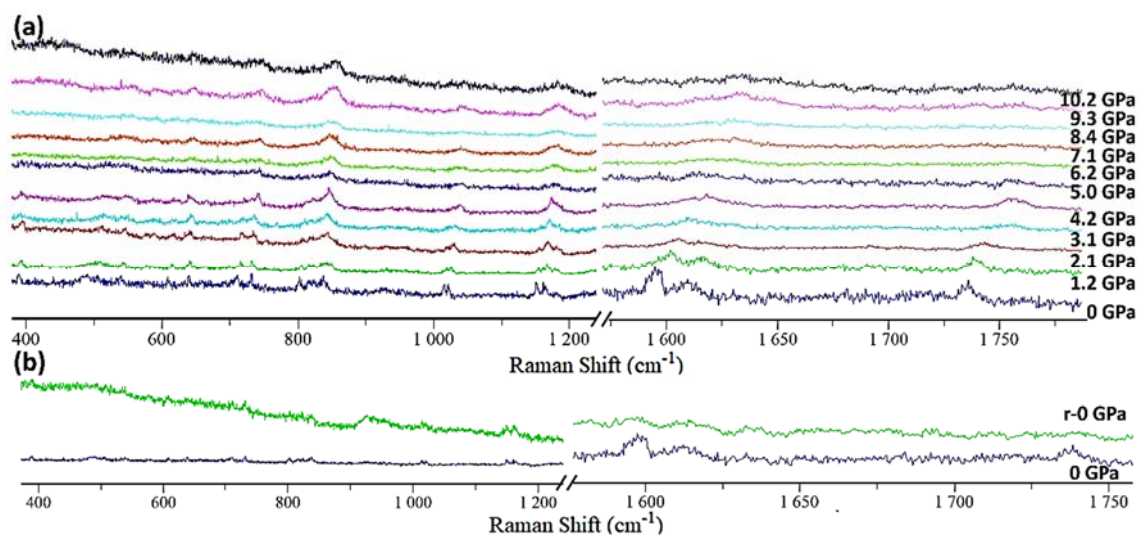

**Figure S7.** (a): *in situ* Raman spectroscopy ( $\lambda_{\text{ex}} = 785 \text{ nm}$ ) of **PP** under compression process in the range of 0-10.2 GPa; (b): *in situ* Raman spectroscopy of **PP** before and after pressure treatment.

#### 5) *In situ* Raman Spectra of **PP-H**

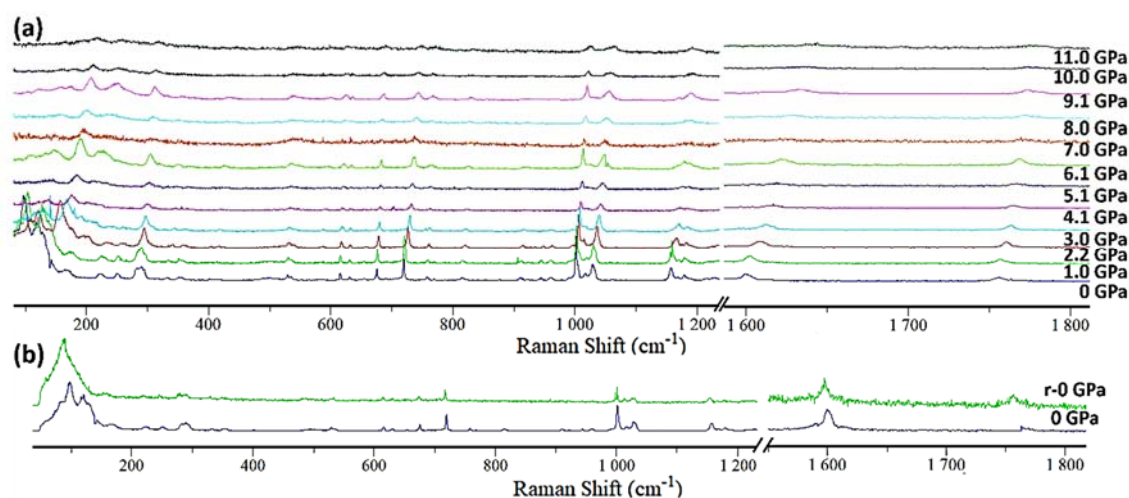

**Figure S8.** (a): *in situ* Raman spectroscopy ( $\lambda_{\text{ex}} = 785 \text{ nm}$ ) of **PP-H** under compression process in the range of 0-11.0 GPa; (b): *in situ* Raman spectroscopy of **PP-H** before and after pressure treatment.

#### 6) *In situ* UV-vis Absorption Spectra for **PP-H**

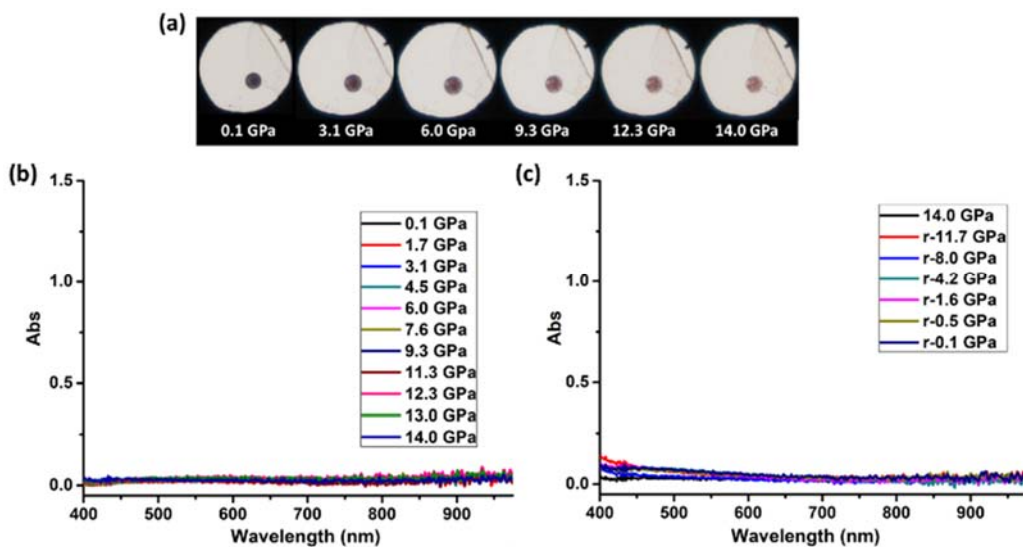

**Figure S9.** (a) Real optical images of **PP-H** crystal in the compression process; (b) *in situ* UV-vis absorption spectra of **PP-H** under compression in the range of 0-14.0 GPa; (c) *in situ* UV-vis absorption spectra of **PP-H** under high pressure during the decompression process.

7) *In situ* UV-vis Absorption Spectra for **PP-NMe<sub>2</sub>** dispersed in PMMA film

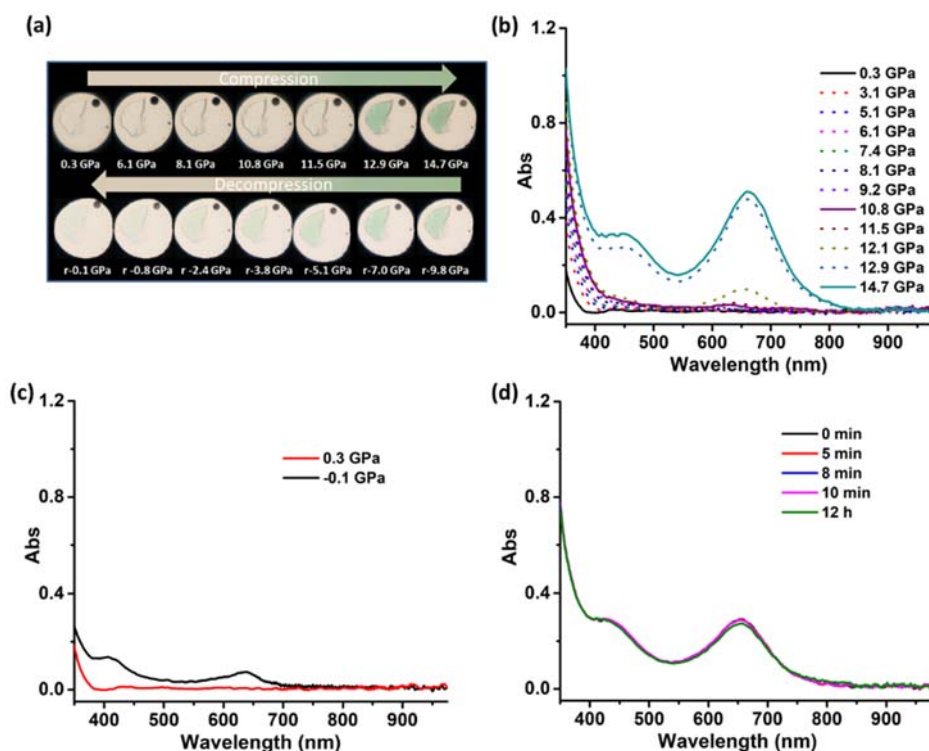

**Figure S10.** **PP-NMe<sub>2</sub>** (5 wt%) PMMA film (a) Real optical images under different pressures; (b) *In situ* UV-vis absorption spectra under compression in the range of 0-13.2 GPa; (c) The comparison of UV-vis absorption spectra before (0.3 GPa) and after (r-0.1 GPa) the pressure treatment; (d) *In situ* UV-vis spectra over different time under high pressure of r-9.8 GPa.



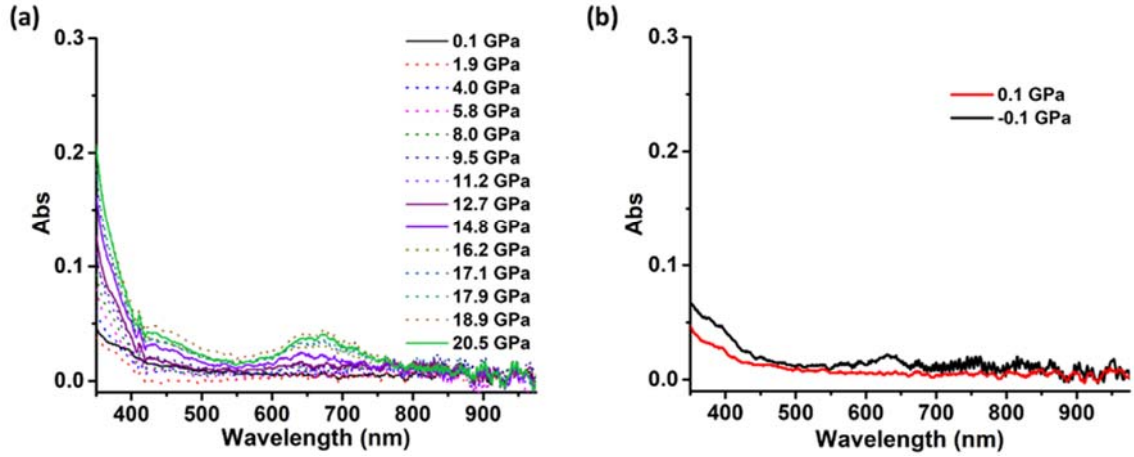

**Figure S11.** PP-NMe<sub>2</sub> (1 wt%) PMMA film (a) *In situ* UV-vis absorption spectra under compression in the range of 0-20.5 GPa; (b) The comparison of UV-vis absorption spectra before (0.1 GPa) and after (-0.1 GPa) the pressure treatment.

### Quantify the Relationship between Pressure and the Ring-opening Reaction

1) Equilibrium constant  $K$  of the ring-opening reaction could be quantified from the fraction of **r-PP** (ring-opening **PP**) as follows:

$$K = \frac{n(\mathbf{r-PP})}{n-n(\mathbf{r-PP})}$$

The  $n$  refers to the amount of **PP** (including ring-closed and -opened **PP**), and  $n(\mathbf{r-PP})$  means the amount of ring-opening **PP**. For a specific experiment, the  $n$  could be regarded as a constant. At the beginning of the ring-opening reaction, the conversion in crystal is low, so the  $n-n(\mathbf{r-PP})$  is approximately equal to  $n$ , in order to get qualitative information and get an approximate working curve. Then  $1/(n-n(\mathbf{r-PP}))$  is regarded as a constant to simplify the formula. (Higher conversion as the increased pressure is one of the reasons to make correlation of  $\ln A(\mathbf{PP})$  with pressure ( $p$ ) deviate from the straight line.)

Furthermore,  $n(\mathbf{r-PP})$  was proportional to absorbance of the characteristic absorption peak of **r-PP**, then  $\ln K$  is approximated to be proportional to the natural logarithm of **r-PP** form:

$$\ln K \propto \ln A(\mathbf{r-PP}) + C \quad (1)$$

2) The effect of pressure on chemical equilibrium could be described by the well-known relationship between pressure ( $p$ ) and Gibbs' enthalpy of reaction<sup>3</sup>:

$$\Delta V = \left( -\frac{\partial \Delta G}{\partial p} \right)_T = \left( -\frac{\partial \ln K}{\partial p} \right)_T RT \quad (2)$$

Where  $\Delta V$  is the change of the volume in the ring-opening reaction.

According to (1) and (2), we can derive the following relationship:

$$\frac{\partial \ln A(\mathbf{r-PP})}{\partial p} \propto \frac{\partial \ln K}{\partial p} = -\frac{\Delta V}{RT}$$

From the correlation, it showed that positive slope indicated a negative value for the volume of reaction, the same as spiropyran isomerization under high pressure<sup>4</sup>. The correlation wavelength was chosen around the ring-opening wavelength.

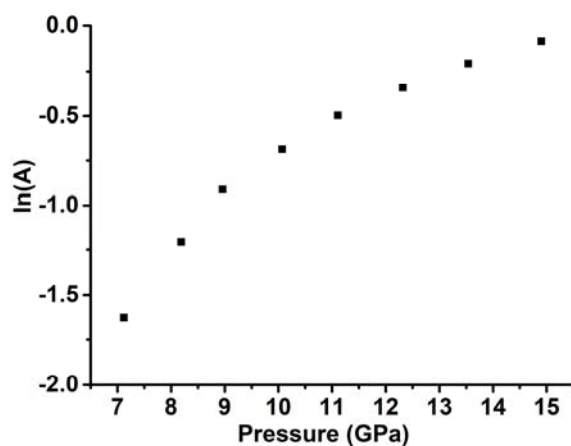

**Figure S12.** Correlation of  $\ln A(\text{PP})$  at 533 nm with pressure (P) in a pressure range of 7.0-14.0 GPa.

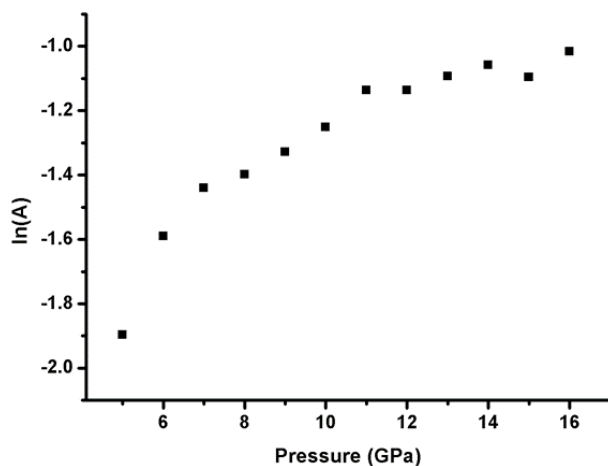

**Figure S13.** Correlation of  $\ln A(\text{PP-NMe}_2)$  at 653 nm with pressure (P) in a limited pressure range of 5.0 -16.0 GPa.

## Crystal Data and Structure Refinement

**Table S1.** The comparison of angles [deg] on the  $\text{sp}^3$  carbon (labeled as O) for PP, PP-NMe<sub>2</sub>, PP-H.

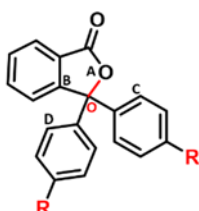

|           | PP     | PP-NMe <sub>2</sub> | PP-H   |
|-----------|--------|---------------------|--------|
| Angle AOB | 102.35 | 101.56              | 102.31 |
| Angle AOC | 107.03 | 107.45              | 106.56 |
| Angle AOD | 107.61 | 107.84              | 107.85 |
| Angle COD | 114.24 | 115.02              | 112.14 |
| Angle BOD | 109.11 | 113.10              | 110.90 |
| Angle BOC | 115.50 | 117.78              | 116.20 |

**Table S2-1.** Crystal data and structure refinement for **PP-NMe<sub>2</sub>**.

|                                   |                                                                                                            |
|-----------------------------------|------------------------------------------------------------------------------------------------------------|
| Identification code               | <b>PP-NMe<sub>2</sub></b>                                                                                  |
| Empirical formula                 | C <sub>24</sub> H <sub>24</sub> N <sub>2</sub> O <sub>2</sub>                                              |
| Formula weight                    | 372.45                                                                                                     |
| Temperature                       | 180.01(10) K                                                                                               |
| Wavelength                        | 0.71073 Å                                                                                                  |
| Crystal system, Space group       | Monoclinic, <i>P2<sub>1</sub>/n</i>                                                                        |
| Unit cell dimensions              | a = 7.8706(16) Å    α = 90 deg.<br>b = 21.886(5) Å    β = 97.560(19)deg.<br>c = 11.121(3) Å    γ = 90 deg. |
| Volume                            | 1898.9(8) Å <sup>3</sup>                                                                                   |
| Z, Density (calculated)           | 4, 1.303 Mg/m <sup>3</sup>                                                                                 |
| Absorption coefficient            | 0.083 mm <sup>-1</sup>                                                                                     |
| F(000)                            | 792.0                                                                                                      |
| Crystal size                      | 0.1 × 0.1 × 0.05 mm <sup>3</sup>                                                                           |
| Theta range for data collection   | 6.414 to 52.02 deg.                                                                                        |
| Index ranges                      | -9 ≤ h ≤ 9, -20 ≤ k ≤ 26, -7 ≤ l ≤ 13                                                                      |
| Reflections collected             | 7099                                                                                                       |
| Independent reflections           | 3689 [R <sub>int</sub> = 0.0587]                                                                           |
| Absorption correction             | Semi-empirical from equivalents                                                                            |
| Refinement method                 | Full-matrix least-squares on F <sup>2</sup>                                                                |
| Data / restraints / parameters    | 3689 / 0 / 257                                                                                             |
| Goodness-of-fit on F <sup>2</sup> | 1.046                                                                                                      |
| Final R indexes [I ≥ 2σ(I)]       | R1 = 0.0806, wR2 = 0.1949                                                                                  |
| R indexes [all data]              | R1 = 0.1161, wR2 = 0.2352                                                                                  |
| Largest diff. peak and hole       | 0.45 and -0.32 e.Å <sup>-3</sup>                                                                           |

**Table S2-2.** Atomic coordinates ( $\times 10^4$ ) and equivalent isotropic displacement parameters ( $\text{\AA}^2 \times 10^3$ ) for **PP-NMe<sub>2</sub>**. U(eq) is defined as one third of the trace of the orthogonalized  $U^{ij}$  tensor.

|     | x        | y          | z          | U(eq)   |
|-----|----------|------------|------------|---------|
| C1  | 1895(4)  | 893.0(13)  | 1221(3)    | 37.0(7) |
| C2  | 2095(3)  | 1696.4(12) | 2627(2)    | 32.6(7) |
| C3  | 239(3)   | 1535.5(12) | 2207(2)    | 32.3(7) |
| C4  | -1245(4) | 1787.6(14) | 2542(3)    | 40.3(7) |
| C5  | -2793(4) | 1529.3(14) | 2058(3)    | 44.7(8) |
| C6  | -2884(4) | 1037.8(14) | 1278(3)    | 46.8(8) |
| C7  | -1395(4) | 789.1(14)  | 937(3)     | 42.5(8) |
| C8  | 140(4)   | 1052.7(12) | 1417(2)    | 33.5(7) |
| C9  | 2547(3)  | 2347.5(12) | 2314(2)    | 32.2(6) |
| C10 | 1999(4)  | 2563.1(13) | 1150(3)    | 37.9(7) |
| C11 | 2359(4)  | 3145.5(13) | 809(3)     | 39.4(7) |
| C12 | 3234(3)  | 3558.9(12) | 1613(2)    | 34.8(7) |
| C13 | 3810(4)  | 3338.1(14) | 2777(3)    | 40.1(7) |
| C14 | 3479(4)  | 2743.2(13) | 3094(3)    | 39.3(7) |
| C15 | 3452(4)  | 4315.2(14) | 40(3)      | 48.8(8) |
| C16 | 4467(4)  | 4561.9(14) | 2142(3)    | 49.3(8) |
| C17 | 2595(3)  | 1518.3(12) | 3947(2)    | 32.7(7) |
| C18 | 3506(3)  | 994.3(13)  | 4288(3)    | 37.6(7) |
| C19 | 3903(4)  | 828.7(13)  | 5491(3)    | 41.0(7) |
| C20 | 3388(4)  | 1188.4(13) | 6413(3)    | 36.8(7) |
| C21 | 2437(4)  | 1708.9(13) | 6061(3)    | 39.8(7) |
| C22 | 2034(4)  | 1864.1(13) | 4857(3)    | 37.0(7) |
| C23 | 4743(4)  | 484.9(16)  | 7950(3)    | 55.2(9) |
| C24 | 3869(5)  | 1499.2(16) | 8524(3)    | 55.1(9) |
| N1  | 3485(3)  | 4157.3(11) | 1310(2)    | 42.7(7) |
| N2  | 3748(3)  | 1026.0(11) | 7618(2)    | 44.4(7) |
| O1  | 2999(2)  | 1280.1(8)  | 1884.4(17) | 35.9(5) |
| O2  | 2404(3)  | 510.9(10)  | 587(2)     | 49.9(6) |

**Table S2-3.** Bond lengths [Å] and angles [deg] for **PP-NMe<sub>2</sub>**

|           |          |             |          |
|-----------|----------|-------------|----------|
| C1-C8     | 1.468(4) | O1-C2-C17   | 107.4(2) |
| C1-O1     | 1.360(3) | C4-C3-C2    | 129.5(3) |
| C1-O2     | 1.196(3) | C8-C3-C2    | 110.4(2) |
| C2-C3     | 1.515(4) | C8-C3-C4    | 120.1(2) |
| C2-C9     | 1.520(4) | C3-C4-C5    | 117.5(3) |
| C2-C17    | 1.520(4) | C6-C5-C4    | 122.2(3) |
| C2-O1     | 1.474(3) | C5-C6-C7    | 120.1(3) |
| C3-C4     | 1.386(4) | C8-C7-C6    | 117.2(3) |
| C3-C8     | 1.370(4) | C3-C8-C1    | 107.7(2) |
| C4-C5     | 1.386(4) | C3-C8-C7    | 122.9(3) |
| C5-C6     | 1.378(5) | C7-C8-C1    | 129.4(3) |
| C6-C7     | 1.390(4) | C10-C9-C2   | 118.5(2) |
| C7-C8     | 1.381(4) | C14-C9-C2   | 124.8(2) |
| C9-C10    | 1.392(4) | C14-C9-C10  | 116.7(2) |
| C9-C14    | 1.369(4) | C11-C10-C9  | 121.5(3) |
| C10-C11   | 1.370(4) | C10-C11-C12 | 122.1(3) |
| C11-C12   | 1.390(4) | C11-C12-C13 | 116.3(3) |
| C12-C13   | 1.400(4) | N1-C12-C11  | 122.6(3) |
| C12-N1    | 1.373(4) | N1-C12-C13  | 121.1(3) |
| C13-C14   | 1.382(4) | C14-C13-C12 | 120.8(3) |
| C15-N1    | 1.451(4) | C9-C14-C13  | 122.5(3) |
| C16-N1    | 1.432(4) | C18-C17-C2  | 122.6(2) |
| C17-C18   | 1.379(4) | C18-C17-C22 | 117.3(3) |
| C17-C22   | 1.381(4) | C22-C17-C2  | 120.0(2) |
| C18-C19   | 1.382(4) | C17-C18-C19 | 121.8(3) |
| C19-C20   | 1.394(4) | C18-C19-C20 | 120.9(3) |
| C20-C21   | 1.391(4) | C21-C20-C19 | 116.9(3) |
| C20-N2    | 1.379(4) | N2-C20-C19  | 121.8(3) |
| C21-C22   | 1.377(4) | N2-C20-C21  | 121.2(3) |
| C23-N2    | 1.441(4) | C22-C21-C20 | 121.5(3) |
| C24-N2    | 1.439(4) | C21-C22-C17 | 121.5(3) |
| O1-C1-C8  | 108.5(2) | C12-N1-C15  | 118.8(2) |
| O2-C1-C8  | 130.4(3) | C12-N1-C16  | 120.9(3) |
| O2-C1-O1  | 121.0(3) | C16-N1-C15  | 114.9(2) |
| C3-C2-C9  | 113.1(2) | C20-N2-C23  | 119.7(3) |
| C3-C2-C17 | 110.8(2) | C20-N2-C24  | 118.7(2) |
| C17-C2-C9 | 115.0(2) | C24-N2-C23  | 115.4(3) |
| O1-C2-C3  | 101.6(2) | C1-O1-C2    | 111.6(2) |
| O1-C2-C9  | 107.8(2) |             |          |

**Table S3-1.** Crystal data and structure refinement for **PP-H**.

|                                         |                                                                                                                                |
|-----------------------------------------|--------------------------------------------------------------------------------------------------------------------------------|
| Identification code                     | <b>PP-H</b>                                                                                                                    |
| Empirical formula                       | $C_{20}H_{14}O_2$                                                                                                              |
| Formula weight                          | 286.31                                                                                                                         |
| Temperature                             | 180.01(10) K                                                                                                                   |
| Wavelength                              | 0.71073 Å                                                                                                                      |
| Crystal system, Space group             | Monoclinic, $P21/n$                                                                                                            |
| Unit cell dimensions                    | $a = 8.4905(6)$ Å $\alpha = 90$ deg.<br>$b = 17.1536(11)$ Å $\beta = 100.649(6)$ deg.<br>$c = 10.3607(6)$ Å $\gamma = 90$ deg. |
| Volume                                  | $1482.97(17)$ Å <sup>3</sup>                                                                                                   |
| Z, Density (calculated)                 | 4, 1.282Mg/m <sup>3</sup>                                                                                                      |
| Absorption coefficient                  | 0.082 mm <sup>-1</sup>                                                                                                         |
| F(000)                                  | 600.0                                                                                                                          |
| Crystal size                            | 0.1 × 0.1 × 0.05 mm <sup>3</sup>                                                                                               |
| Theta range for data collection         | 6.812 to 52.014°                                                                                                               |
| Index ranges                            | -10 ≤ h ≤ 6, -21 ≤ k ≤ 19, -10 ≤ l ≤ 12                                                                                        |
| Reflections collected                   | 5230                                                                                                                           |
| Independent reflections                 | 2881 [ $R_{int} = 0.0278$ , $R_{sigma} = 0.0469$ ]                                                                             |
| Absorption correction                   | Semi-empirical from equivalents                                                                                                |
| Refinement method                       | Full-matrix least-squares on $F^2$                                                                                             |
| Data / restraints / parameters          | 2881 / 0 / 199                                                                                                                 |
| Goodness-of-fit on $F^2$                | 1.039                                                                                                                          |
| Final R indexes [ $I \geq 2\sigma(I)$ ] | $R1 = 0.0462$ , $wR2 = 0.0979$                                                                                                 |
| R indexes [all data]                    | $R1 = 0.0739$ , $wR2 = 0.1155$                                                                                                 |
| Largest diff. peak and hole             | 0.21 and -0.19 e.Å <sup>-3</sup>                                                                                               |



**Table S3-2.** Atomic coordinates ( $\times 10^4$ ) and equivalent isotropic displacement parameters ( $\text{\AA}^2 \times 10^3$ ) for **PP-H**.  $U(\text{eq})$  is defined as one third of the trace of the orthogonalized  $U^{ij}$  tensor.

|     | x          | y          | z          | $U(\text{eq})$ |
|-----|------------|------------|------------|----------------|
| O1  | 9921.9(14) | 6804.7(7)  | 4996.5(11) | 31.1(3)        |
| O2  | 9358.8(17) | 6239.3(9)  | 6800.4(13) | 50.1(4)        |
| C2  | 9073(2)    | 7076.7(10) | 3706.0(15) | 26.6(4)        |
| C15 | 9361(2)    | 7950.2(10) | 3662.2(15) | 27.4(4)        |
| C3  | 7362(2)    | 6823.7(10) | 3713.4(16) | 27.0(4)        |
| C9  | 9758.5(19) | 6642.1(10) | 2655.8(16) | 27.1(4)        |
| C1  | 8888(2)    | 6476.3(11) | 5704.1(17) | 33.4(4)        |
| C8  | 7285(2)    | 6476.3(10) | 4896.9(16) | 29.9(4)        |
| C4  | 5997(2)    | 6873.2(11) | 2746.6(17) | 32.7(4)        |
| C20 | 8176(2)    | 8474.8(11) | 3148.0(17) | 36.3(5)        |
| C16 | 10909(2)   | 8223.6(11) | 4108.5(17) | 35.2(5)        |
| C14 | 9840(2)    | 7000.7(11) | 1475.7(17) | 33.9(4)        |
| C18 | 10063(3)   | 9527.5(12) | 3546.8(19) | 44.5(5)        |
| C11 | 10829(2)   | 5477.2(11) | 1864.6(18) | 39.1(5)        |
| C10 | 10241(2)   | 5874.5(11) | 2829.3(17) | 33.6(4)        |
| C12 | 10923(2)   | 5842.5(12) | 696.0(18)  | 38.4(5)        |
| C19 | 8538(3)    | 9262.2(12) | 3083.1(19) | 44.2(5)        |
| C7  | 5876(2)    | 6175.9(12) | 5182.9(19) | 40.7(5)        |
| C13 | 10415(2)   | 6598.1(12) | 499.4(18)  | 38.6(5)        |
| C6  | 4516(2)    | 6238.6(13) | 4232(2)    | 45.6(5)        |
| C17 | 11247(3)   | 9009.7(12) | 4062.3(19) | 43.6(5)        |
| C5  | 4577(2)    | 6582.4(12) | 3033.9(19) | 41.0(5)        |

**Table S3-3.** Bond lengths [Å] and angles [deg] for **PP-H**

|           |            |             |            |
|-----------|------------|-------------|------------|
| O1-C2     | 1.4726(19) | C3-C2-C9    | 110.90(14) |
| O1-C1     | 1.365(2)   | C20-C15-C2  | 122.96(15) |
| O2-C1     | 1.203(2)   | C20-C15-C16 | 118.99(17) |
| C2-C15    | 1.520(2)   | C16-C15-C2  | 117.99(16) |
| C2-C3     | 1.518(2)   | C8-C3-C2    | 109.37(14) |
| C2-C9     | 1.521(2)   | C8-C3-C4    | 119.95(16) |
| C15-C20   | 1.381(2)   | C4-C3-C2    | 130.65(15) |
| C15-C16   | 1.392(2)   | C14-C9-C2   | 120.21(16) |
| C3-C8     | 1.376(2)   | C10-C9-C2   | 121.19(15) |
| C3-C4     | 1.387(2)   | C10-C9-C14  | 118.53(16) |
| C9-C14    | 1.382(2)   | O1-C1-C8    | 108.44(14) |
| C9-C10    | 1.381(3)   | O2-C1-O1    | 120.83(17) |
| C1-C8     | 1.461(3)   | O2-C1-C8    | 130.72(17) |
| C8-C7     | 1.383(3)   | C3-C8-C1    | 108.51(15) |
| C4-C5     | 1.387(3)   | C3-C8-C7    | 122.53(17) |
| C20-C19   | 1.390(3)   | C7-C8-C1    | 128.95(16) |
| C16-C17   | 1.381(3)   | C5-C4-C3    | 117.79(17) |
| C14-C13   | 1.386(3)   | C15-C20-C19 | 119.98(18) |
| C18-C19   | 1.372(3)   | C17-C16-C15 | 120.45(18) |
| C18-C17   | 1.373(3)   | C9-C14-C13  | 120.38(18) |
| C11-C10   | 1.377(3)   | C19-C18-C17 | 119.80(19) |
| C11-C12   | 1.379(3)   | C10-C11-C12 | 120.00(18) |
| C12-C13   | 1.369(3)   | C11-C10-C9  | 121.06(17) |
| C7-C6     | 1.377(3)   | C13-C12-C11 | 119.53(17) |
| C6-C5     | 1.384(3)   | C18-C19-C20 | 120.6(2)   |
| C1-O1-C2  | 111.29(13) | C6-C7-C8    | 117.47(18) |
| O1-C2-C15 | 106.56(13) | C12-C13-C14 | 120.46(17) |
| O1-C2-C3  | 102.32(13) | C7-C6-C5    | 120.65(19) |
| O1-C2-C9  | 107.84(13) | C18-C17-C16 | 120.21(19) |
| C15-C2-C9 | 112.14(14) | C6-C5-C4    | 121.60(18) |
| C3-C2-C15 | 116.19(14) |             |            |

## References

- (1) T. Bizjak, J. Karpiuk, S. Lochbrunner and E. Riedle, *J. Phys. Chem. A*, 2004, **108**, 10763-10769.
- (2) C. B. DeZutter, J. H. Horner and M. Newcomb, *J. Phys. Chem. A*, 2008, **112**, 1891-1896.
- (3) R. Van Eldik and F.-G. Klärner, *High Pressure Chemistry: Synthetic, Mechanistic, and Supercritical Applications*, John Wiley & Sons, 2008.
- (4) X. Meng, G. Qi, C. Zhang, K. Wang, B. Zou and Y. Ma, *Chem. Commun.*, 2015, **51**, 9320-9323.
